# Supplementary material
Source: PubMed Central journal article supplement (PMC4333743)
Supplement: NIHMS662624-supplement-SI.pdf [file NIHMS662624-supplement-SI.pdf]

## Supporting Information

### **Protein Conformational Landscapes and Catalysis. Influence of active site conformations in the reaction catalyzed by L-Lactate Dehydrogenase.**

**Katarzyna Świderek,<sup>\*,1,2</sup> Iñaki Tuñon<sup>1</sup>, Sergio Martí,<sup>3</sup> and Vicent Moliner<sup>\*,3</sup>**

*1. Departament de Química Física, Universitat de València, 46100 Burjassot, (Spain)*

*2. Institute of Applied Radiation Chemistry, Lodz University of Technology, 90-924 Lodz, (Poland)*

*3. Departament de Química Física i Analítica, Universitat Jaume I, 12071 Castelló (Spain)*

Corresponding Authors

\*E-mail: katarzyna.swiderek@uv.es. Fax: (+34) 963544564

\*E-mail: moliner@uji.es. Fax: (+34) 964728066

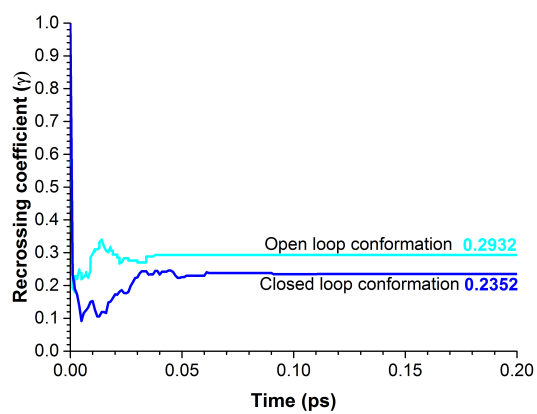

Figure S1. Time-dependent evolution of the recrossing transmission coefficients,  $\gamma(t)$ , obtained for both conformations of the enzyme at 300 K.

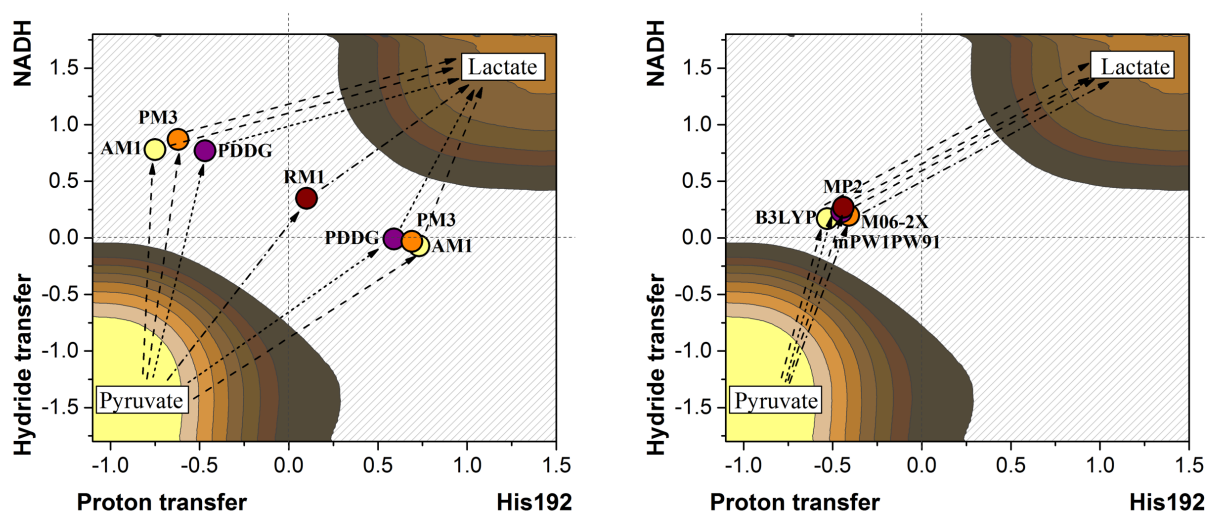

**Figure S2.** Summary of TS localized in the closed active site at different level of QM theory during QM/MM calculations. On left semiempirical (AM1 – yellow, PM3 – orange, PDDG/PM3 – purple, RM1 – brown), on right DFT and ab initio methods (B3LYP – yellow, M06-2X – orange, mPW1PW91 – purple, MP2 – brown). The reaction coordinate for the hydride transfer is defined as the the anti-symmetric combination of the distances between the transferring hydride-ion and the donor ( $C4_{\text{Nic}}$ ) and the acceptor ( $C2_{\text{pyr}}$ ) atoms. For the proton transfer the reaction coordinate is defined as the difference in the distance of the bonds between the transferring proton and the donor ( $N_{\text{His}}$ ) and the acceptor ( $O_{\text{pyr}}$ )

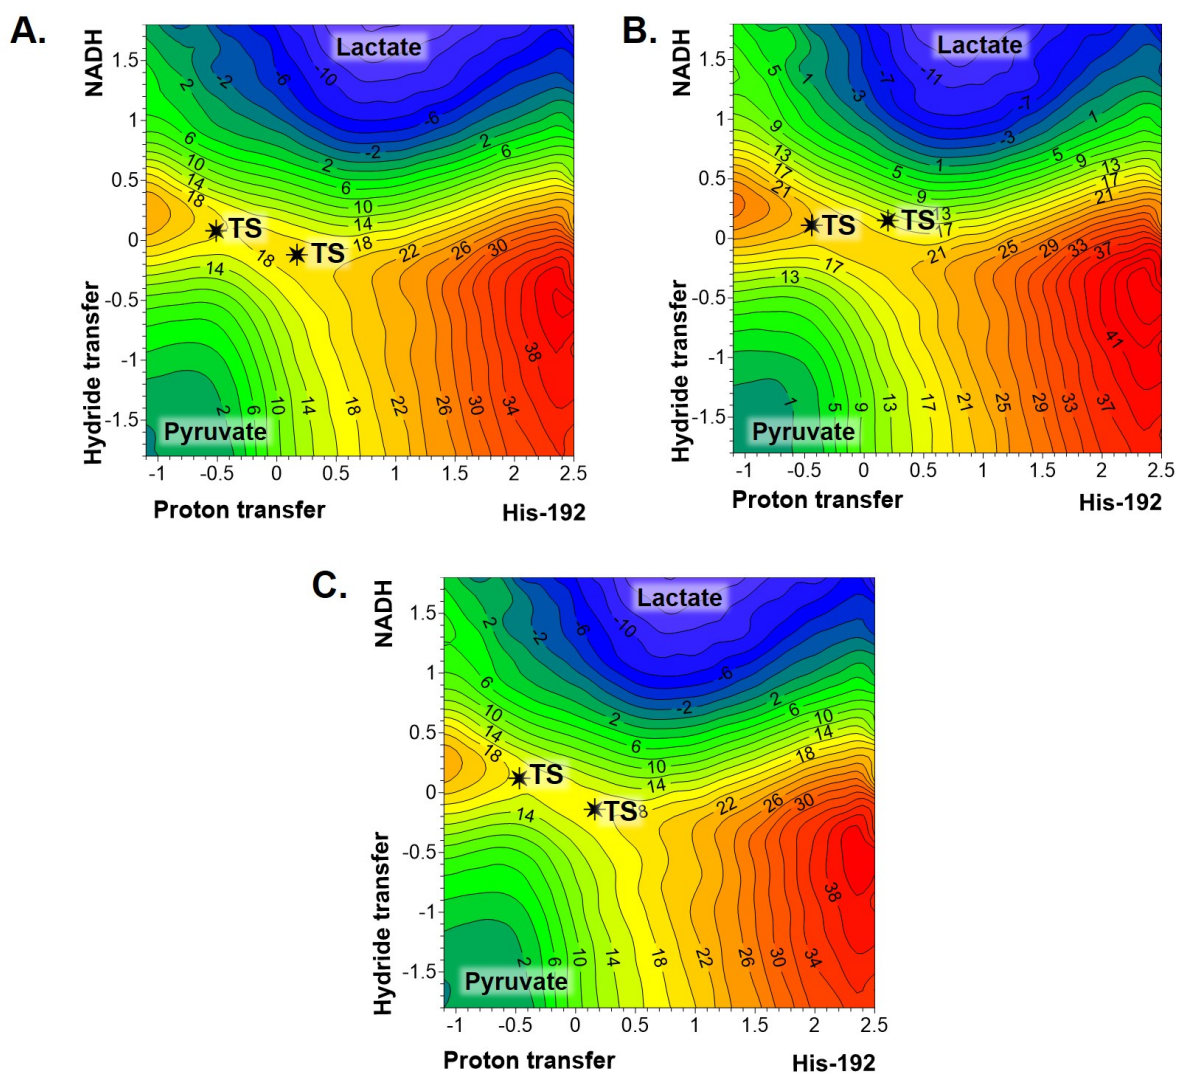

**Figure S3.** RM1/MM free energy surfaces, computed as 2D PMFs, with spline corrections at: A) B3LYP/MM; B) M06-2X/MM; and C) mPW1PW91/MM level of theory for the pyruvate to lactate transformation catalysed by LDH with open loop conformation. Values of isoenergetic contour lines are reported in  $\text{kcal}\cdot\text{mol}^{-1}$ , and distances in Å. Black stars indicate the position of TSs localized on the PESs at the corresponding levels of theory.

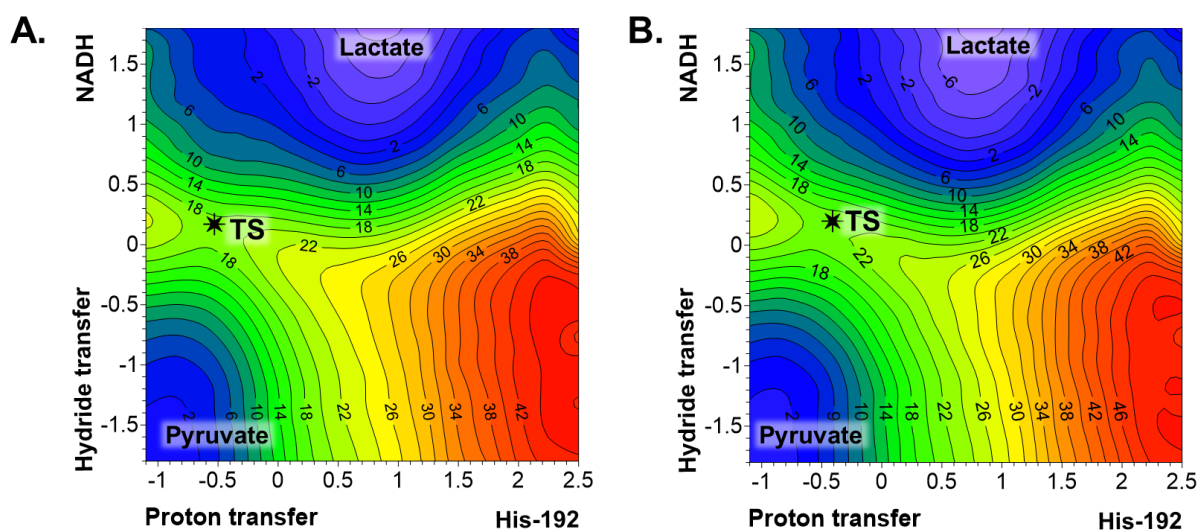

**Figure S4.** AM1/MM free energy surfaces, computed as 2D PMFs, with spline corrections at: A) B3LYP/MM; and B) M06-2X/MM level of theory for the pyruvate to lactate transformation catalysed by LDH with closed loop conformation. Values of isoenergetical contour lines are reported in  $\text{kcal}\cdot\text{mol}^{-1}$ , and distances in  $\text{\AA}$ . Black stars indicate the position of TSs localized on the PESs at the corresponding levels of theory.

**Table S1.** Sum of ChelpG atomic charges on His192, Pyruvate and NADH species (in a.u.) computed in reactant complex (RC), TS and product complex (PC) at M06-2X/MM level for the open and closed loop conformation

|                                 | RC     | TS     | PC     |
|---------------------------------|--------|--------|--------|
| <b>Open loop conformation</b>   |        |        |        |
| imidazole ring of His192        | 1.020  | 0.625  | 0.312  |
| pyruvate                        | -1.164 | -1.634 | -1.271 |
| nicotinamide ring of NADH       | 0.145  | 0.506  | 0.959  |
| <b>Closed loop conformation</b> |        |        |        |
| imidazole ring of His192        | 1.004  | 0.612  | 0.060  |
| pyruvate                        | -1.096 | -1.510 | -1.102 |
| nicotinamide ring of NADH       | 0.093  | 0.551  | 1.042  |
